# Supplementary material for: Solvent-free esterification catalyzed by surfactant-combined catalysts at room temperature
Source: Royal Society of Chemistry journal article supplement (doi:10.1039/b615448d), 2007-01-01

## Solvent-free esterification catalyzed by surfactant-combined catalysts at room temperature

Li Gang\*, Li Xinzong and Wumanjiang Eli

### IR spectrograms of part product esters

#### 1. 1-Octyl oleate 130-132°C (17P)

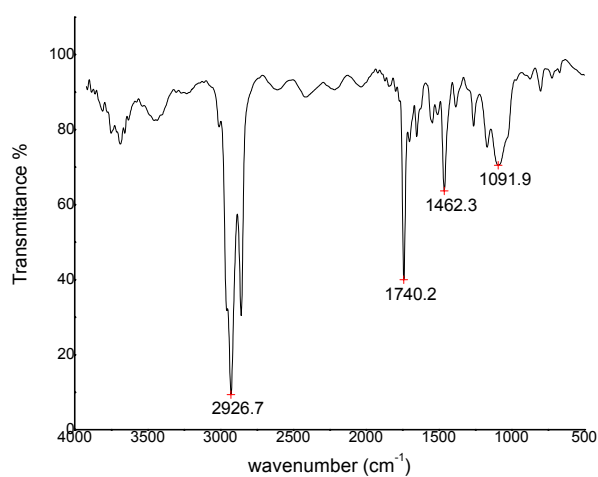

#### 2. iso-Butyl caprylate 94-96°C (17P)

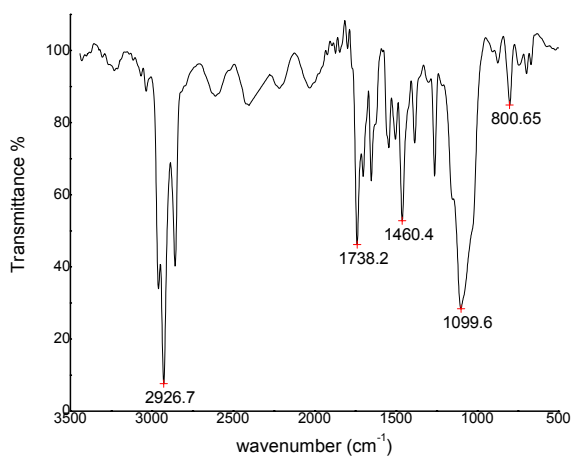

3. 1-Amyl caprylate 125-126°C (45P)

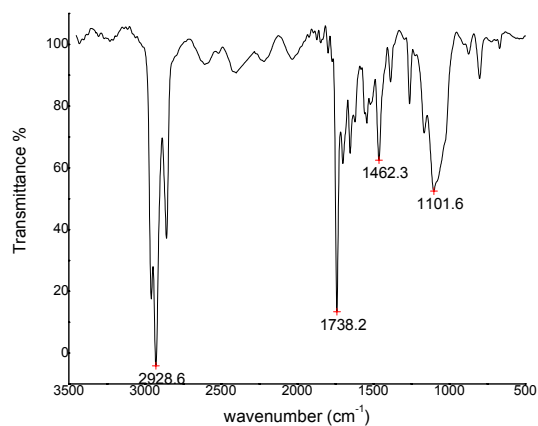

4. 1-Octyl acrylate 81-83°C (25P)

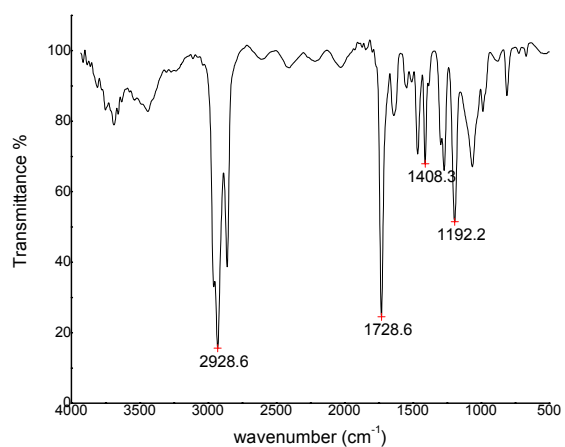

5. sec- Buty caprylate 95-97°C (24P)

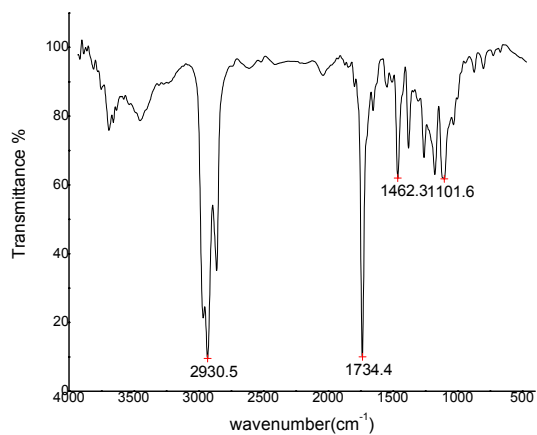

Supplement: b615448d.pdf [file b615448d.pdf]
